# Supplementary material
Source: PubMed Central journal article supplement (PMC8778607)
Supplement: jamaotolaryngolheadnecksurg-e214052-s001.pdf [file jamaotolaryngolheadnecksurg-e214052-s001.pdf]

## Supplemental Online Content

Shah H, Wang Y, Cheng S-C, et al. Use of fluoro- $^{18}\text{F}$ -deoxy-2-D-glucose positron emission tomography/computed tomography to predict immunotherapy treatment response in patients with squamous cell oral cavity cancers. *JAMA Otolaryngol Head Neck Surg*. Published online January 20, 2022. doi:10.1001/jamaoto.2021.4052

**eFigure.** Correlation of CD8 and FDG Uptake

**eTable 1.** FDG-PET/CT Technical Parameters (median, range)

**eTable 2.** Correlation between change of primary tumor SUVmax and pathologic response (%) in two treatment cohorts

This supplemental material has been provided by the authors to give readers additional information about their work.

## Supplemental Figure

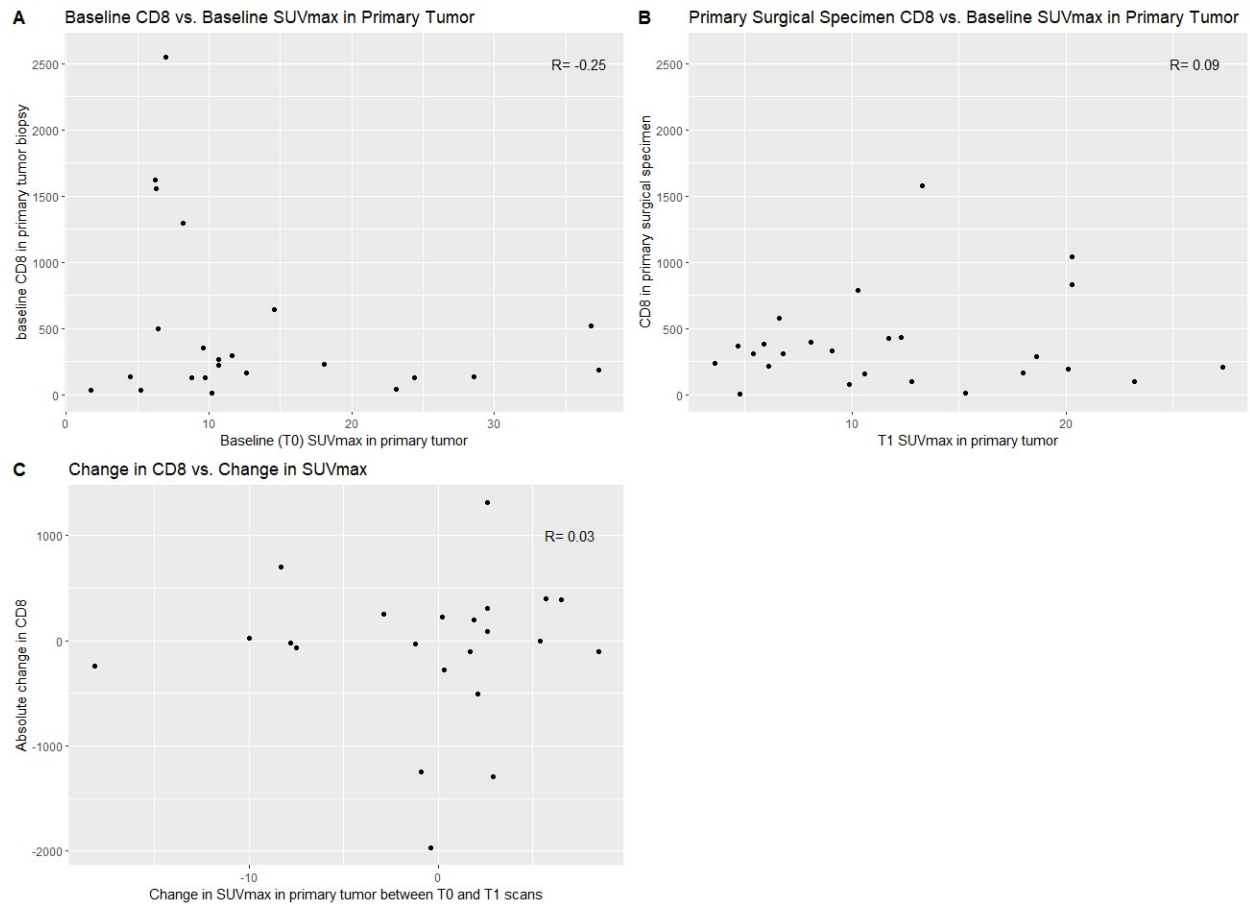

**eFigure. Correlation of CD8 and FDG Uptake.** For both the primary OCSCC and the most FDG-avid metastatic ipsilateral cervical lymph node, SUVmax was not correlated with the number of CD8 positive T-cells at **(A)** baseline or **(B)** after preoperative immunotherapy. **(C)** Change in CD8 positive T-cells in the primary OCSCC between the baseline biopsy specimen and post-immunotherapy surgical specimen did not correlate with change in SUVmax between T0 and T1 FDG-PET/CT scans.

## Supplemental Tables

| <b>eTable 1. FDG-PET/CT Technical Parameters (median, range)</b> |               |             |          |
|------------------------------------------------------------------|---------------|-------------|----------|
|                                                                  | T0            | T1          | P-value* |
| Injected FDG activity (mCi)                                      | 10 (9.3-17.1) | 10 (9.8-14) | 0.67     |
| FDG uptake time (min)                                            | 61 (50-96)    | 61 (50-82)  | 0.65     |
| Blood glucose level (mg/dL)                                      | 101 (84-138)  | 98 (65-136) | 0.02     |
| *Wilcoxon signed-rank test p-values                              |               |             |          |

| <b>eTable 2. Correlation between change of primary tumor SUVmax and pathologic response (%) in two treatment cohorts</b> |                                 |         |                                 |         |
|--------------------------------------------------------------------------------------------------------------------------|---------------------------------|---------|---------------------------------|---------|
|                                                                                                                          | Nivolumab (n=13)                |         | Nivolumab and Ipilimumab (n=14) |         |
| SUVmax                                                                                                                   | Pearson Correlation Coefficient | P-value | Pearson Correlation Coefficient | P-value |
| Absolute Change                                                                                                          | -0.035                          | 0.91    | -0.016                          | 0.96    |
| Percentage Change                                                                                                        | -0.295                          | 0.33    | 0.34                            | 0.23    |
